# Supplementary material
Source: publisher figshare collection journal article supplement (https://gsajournals.figshare.com/ndownloader/files/17804612)
Supplement: Supplementary file 1 [file 17804612]

**Statistics for all wells in the raw data set from *populous simonii* (>500 bp)**

3,147,743 reads out of 3,147,743 (100.0%)

29,647,972,079 base pairs out of 29,647,972,079 (100.0%)

9,418 average read length

8,152 standard deviation

Base composition: 0.317(A) 0.186(C) 0.180(G) 0.316(T)

Distribution of Read Lengths (Bin size = 1,000)

Bin: Count % Reads % Bases Average

112,000: 1 0.0 0.0 112390

111,000: 0 0.0 0.0 112390

110,000: 0 0.0 0.0 112390

109,000: 0 0.0 0.0 112390

108,000: 0 0.0 0.0 112390

107,000: 1 0.0 0.0 110105

106,000: 2 0.0 0.0 108284

105,000: 0 0.0 0.0 108284

104,000: 0 0.0 0.0 108284

103,000: 1 0.0 0.0 107421

102,000: 0 0.0 0.0 107421

101,000: 0 0.0 0.0 107421

100,000: 1 0.0 0.0 106336

99,000: 0 0.0 0.0 106336

98,000: 0 0.0 0.0 106336

97,000: 0 0.0 0.0 106336

96,000: 1 0.0 0.0 104934

95,000: 0 0.0 0.0 104934

94,000: 1 0.0 0.0 103611

93,000: 0 0.0 0.0 103611

92,000: 0 0.0 0.0 103611

91,000: 4 0.0 0.0 99555

90,000: 2 0.0 0.0 98223

89,000: 7 0.0 0.0 95261

88,000: 9 0.0 0.0 93200

87,000: 4 0.0 0.0 92537

86,000: 8 0.0 0.0 91377

85,000: 6 0.0 0.0 90611

84,000: 11 0.0 0.0 89466

83,000: 9 0.0 0.0 88690

82,000: 9 0.0 0.0 87968

81,000: 10 0.0 0.0 87236

80,000: 8 0.0 0.0 86671

79,000: 17 0.0 0.0 85583

78,000: 24 0.0 0.0 84343

77,000: 14 0.0 0.0 83708

76,000: 32 0.0 0.1 82447

75,000: 23 0.0 0.1 81664

74,000: 19 0.0 0.1 81057

73,000: 28 0.0 0.1 80218

72,000: 34 0.0 0.1 79302

71,000: 47 0.0 0.1 78202

70,000: 61 0.0 0.1 77006

69,000: 54 0.0 0.1 76100

68,000: 73 0.0 0.1 75038

67,000: 67 0.0 0.1 74182

66,000: 87 0.0 0.2 73196

65,000: 88 0.0 0.2 72306

64,000: 104 0.0 0.2 71369

63,000: 127 0.0 0.2 70365

62,000: 142 0.0 0.3 69379

61,000: 164 0.0 0.3 68384

60,000: 183 0.0 0.3 67413

59,000: 223 0.1 0.4 66380

58,000: 226 0.1 0.4 65457

57,000: 264 0.1 0.5 64502

56,000: 293 0.1 0.5 63559

55,000: 374 0.1 0.6 62505

54,000: 389 0.1 0.7 61546

53,000: 429 0.1 0.8 60610

52,000: 478 0.1 0.8 59676

51,000: 585 0.2 0.9 58667

50,000: 663 0.2 1.1 57667

49,000: 724 0.2 1.2 56700

48,000: 846 0.2 1.3 55702

47,000: 885 0.2 1.5 54778

46,000: 1,160 0.3 1.6 53712

45,000: 1,218 0.3 1.8 52735

44,000: 1,454 0.4 2.0 51710

43,000: 1,598 0.4 2.3 50723

42,000: 1,904 0.5 2.5 49691

41,000: 2,163 0.6 2.8 48668

40,000: 2,494 0.6 3.2 47640

39,000: 2,872 0.7 3.6 46611

38,000: 3,293 0.8 4.0 45584

37,000: 3,654 0.9 4.5 44587

36,000: 4,262 1.1 5.0 43570

35,000: 4,904 1.2 5.6 42549

34,000: 5,619 1.4 6.2 41531

33,000: 6,636 1.6 7.0 40486

32,000: 7,676 1.9 7.8 39441

31,000: 8,717 2.1 8.7 38413

30,000: 10,173 2.5 9.8 37375

29,000: 11,783 2.8 11.0 36336

28,000: 13,632 3.3 12.3 35298

27,000: 15,595 3.8 13.7 34272

26,000: 18,161 4.3 15.3 33238

25,000: 21,170 5.0 17.2 32200

24,000: 24,595 5.8 19.2 31161

23,000: 28,192 6.7 21.4 30135

22,000: 32,576 7.7 23.9 29111

21,000: 37,460 8.9 26.6 28094

20,000: 42,974 10.3 29.6 27085

19,000: 48,911 11.8 32.8 26088

18,000: 55,548 13.6 36.3 25102

17,000: 63,000 15.6 40.0 24126

16,000: 71,800 17.9 44.0 23152

15,000: 81,204 20.5 48.2 22186

14,000: 92,049 23.4 52.7 21224

13,000: 103,780 26.7 57.4 20268

12,000: 116,921 30.4 62.4 19318

11,000: 125,084 34.4 67.2 18414

10,000: 126,640 38.4 71.7 17585

9,000: 129,427 42.5 75.8 16802

8,000: 137,517 46.9 79.8 16028

7,000: 146,939 51.5 83.5 15255

6,000: 159,869 56.6 87.0 14469

5,000: 175,518 62.2 90.2 13664

4,000: 194,993 68.4 93.2 12833

3,000: 218,984 75.4 95.8 11971

2,000: 255,214 83.5 97.9 11049

1,000: 317,047 93.5 99.5 10018

0: 203,501 100.0 100.0 9418

**Statistics of all data sets using FALCON to correct error bases for subsequent assembly**

1,690,300 reads out of 1,690,300 (100.0%)

16,147,948,728 base pairs out of 16,147,948,728 (100.0%)

9,553 average read length

6,176 standard deviation

Base composition: 0.325(A) 0.175(C) 0.174(G) 0.326(T)

Distribution of Read Lengths (Bin size = 1,000)

Bin: Count % Reads % Bases Average

77,000: 4 0.0 0.0 77435

76,000: 0 0.0 0.0 77435

75,000: 1 0.0 0.0 77018

74,000: 0 0.0 0.0 77018

73,000: 1 0.0 0.0 76361

72,000: 2 0.0 0.0 75422

71,000: 0 0.0 0.0 75422

70,000: 5 0.0 0.0 73455

69,000: 5 0.0 0.0 72380

68,000: 6 0.0 0.0 71389

67,000: 6 0.0 0.0 70606

66,000: 4 0.0 0.0 70101

65,000: 3 0.0 0.0 69741

64,000: 12 0.0 0.0 68435

63,000: 8 0.0 0.0 67740

62,000: 13 0.0 0.0 66777

61,000: 15 0.0 0.0 65859

60,000: 21 0.0 0.0 64796

59,000: 22 0.0 0.1 63888

58,000: 18 0.0 0.1 63210

57,000: 31 0.0 0.1 62211

56,000: 37 0.0 0.1 61229

55,000: 30 0.0 0.1 60524

54,000: 45 0.0 0.1 59586

53,000: 48 0.0 0.1 58717

52,000: 67 0.0 0.1 57684

51,000: 82 0.0 0.2 56639

50,000: 107 0.0 0.2 55528

49,000: 102 0.0 0.2 54636

48,000: 156 0.1 0.3 53512

47,000: 136 0.1 0.3 52681

46,000: 182 0.1 0.4 51715

45,000: 204 0.1 0.4 50786

44,000: 282 0.1 0.5 49714

43,000: 304 0.1 0.6 48750

42,000: 359 0.1 0.7 47782

41,000: 487 0.2 0.8 46688

40,000: 533 0.2 0.9 45696

39,000: 629 0.2 1.1 44711

38,000: 759 0.3 1.3 43710

37,000: 904 0.3 1.5 42710

36,000: 1,126 0.4 1.7 41673

35,000: 1,240 0.5 2.0 40713

34,000: 1,492 0.6 2.3 39734

33,000: 1,809 0.7 2.7 38733

32,000: 2,122 0.8 3.1 37745

31,000: 2,562 0.9 3.6 36741

30,000: 3,087 1.1 4.2 35729

29,000: 3,624 1.3 4.9 34732

28,000: 4,432 1.6 5.7 33712

27,000: 5,108 1.9 6.5 32725

26,000: 6,118 2.3 7.5 31731

25,000: 7,555 2.7 8.7 30702

24,000: 8,921 3.2 10.1 29691

23,000: 10,611 3.9 11.6 28685

22,000: 12,836 4.6 13.4 27668

21,000: 15,365 5.5 15.5 26653

20,000: 18,323 6.6 17.8 25644

19,000: 21,757 7.9 20.4 24642

18,000: 25,684 9.4 23.3 23650

17,000: 29,740 11.2 26.6 22681

16,000: 35,702 13.3 30.2 21697

15,000: 42,133 15.8 34.3 20716

14,000: 50,094 18.8 38.7 19732

13,000: 59,558 22.3 43.7 18744

12,000: 70,642 26.5 49.2 17756

11,000: 82,256 31.3 55.0 16782

10,000: 92,555 36.8 61.0 15846

9,000: 103,351 42.9 67.1 14940

8,000: 117,547 49.9 73.3 14041

7,000: 133,779 57.8 79.5 13144

6,000: 149,816 66.6 85.5 12259

5,000: 161,944 76.2 91.0 11409

4,000: 161,942 85.8 95.6 10638

3,000: 135,141 93.8 98.5 10031

2,000: 78,378 98.4 99.8 9680

1,000: 22,619 99.8 100.0 9572

0: 3,701 100.0 100.0 9553
